# Supplementary material for: Expression Patterns of Three Important Hormone Genes and Respiratory Metabolism in Antheraea pernyi during Pupal Diapause under a Long Photoperiod
Source: MDPI journal article supplement (doi:10.3390/insects12080699), 2021-08-04

Fig.S1

# *ApPTTH* gene

```

1  ATGATATCAAGATCTATCGTTATATTACTAGCATGCTCGGGGTGTTGATTATAATGGAAGCACTAATGCCTAGAACAAATGGCAATGAAA
1  M I S R S I V I L L A C S G V L I I M E A L M P R T M A M K
91  AGTACTAGAAACATACATGAATTCATGATTGAAGATCAAAGGACACGCAAGAAACACAATTACATGTTTCAAAGAGATAGGAACACGAT
31  S T R N I H E F M I E D Q R T R K K H N Y M F Q R D R N N D
81  ATTTTACGGAATAAAAAAATGGTCTGATGATGATATGGAATCTTTAGAAATAGATTCAAGCCCTGAAGATTATCAAACCTCGTGATG
61  I L R N K N N G L M Y D M E S L E I D S S P E D Y S N L V M
71  GATTATGCAAAATGAAAAAGACGATGCTTTTTATTGGATAATCCATAGAACTAGAACGCGAAAAAGAGGCAATATTAAGCGTGTA
91  D Y A N M K K N D V F L L D N S I E T R T R K R G N I K R
361  AGTATTAATGCAATTATATCAGCACTTAACCACAGCTTGGTCCAGTTAAGTGCCGCGCACTACGATGCAGTAAGTTGCGGTGCGG
451  TTTTATCCGCAATAAATAGTACGAGCCTGGGGTGGTATTTCCAGATTAGTCTAAGACCCCGTTATTACCAGCCCTTCTTATTTTCATA
541  TTACTTTATCGATTTTACATGTTTTAATGACTCTTGAGAAAAACAATATTATTTACAATTACTTTTTTGCAACGTACTCTAATTATT
631  ATATCTTCCATGACGATGCTTTATCAAACTGAATCATTATTTTGTAACTGTACAAACAATAATAGTAATATACAATAGTAAAAACG
721  TGTACTGTCAGTAAATACATTTAATGAGCAACCGAAAAATGTGCAGTGAAAGGTTGCAAAAGACCTAAAGGCAATCAACCCGATTAAA
811  TCCGGTGGGGAATTTACCAGCAGTGCAGCGCTTTCCATACAATCTATATGTTACAAATTTTGCCTTAAAAATTCGTGTGCATAAAAAC
901  CGTAATACCGTATCGGAACTAACCTCGAGAGCTACATAAGTAGTAATTGGTAAATGTACGGGTTAACTATAATAGATAATATTTTATT
991  TCATTTTCAGCAAAACATTCCTGATCCGCTTGCAGCTGTGAGTATACAGTAAGTATGTTTCATATAGCAATTTAAAACACTTAATCCTT
120  Q N I P D P P C S C E Y T
1081  TACAAAAAATTGAAGGTTTAAAAATTATTTAAATTAATAAATTTACAGAAATGAACTGTAGATTTCCGCGAGAATGCTTTCCCGAGACAT
133  N E T V D F G E N A F P R H
1171  GTCGAATCTAGAAATTTAGTGAGTTACGACAATCATCGTGTCTCTTTCCGTACGTTTGAAGGAAACCTTATATGATGTAAGTGATATT
147  V E S R N C S E L R Q S S C L F P Y V C K E T L Y D
1261  ATTTTATAGATAATCTAAATTTATCGTTGTACATTAATTTATTCGAGTTTGACCAACTAGTAAAGAAATGTCAGCAGAACTATCTGTCGGTT
1351  TACATTATCAATAGTTTAGGAAATATTTCACTCATAGGCACCTTTCTGCCTATTTCTGGATTGGATATGATTATGTAAGAGTGAACAT
1441  GGGATCTGTTAGTAATTTGGAATAAAATTTGGGTGGTTATGTCCGACTCGCACGGACCAAAACCCACGGTGTACGTCGTCGCTATAGT
1531  TGGGGCGGCACGAGATCTCTATAGACTTTCATCGTGCCGCCACGCGGTTGGCTACATCTACACCAACTTGTGTCAAGTAAACTAGAGAAG
1621  CGATTCGCCACTTTTTTAACTCAGCAACGTACTAACATAATCTTTATAACATAATCACAATTCGCGGCACCCCTACATGCAATGCAA
1711  CGAATTTTACACAGTTTCTGGACTTTTTTTTTTTTCTCGAATTGACTATTGACCCGGCAGGTTTCACAGCTTTCCTGGACAGTGAT
1801  CAACAACTAATCAAATCAAGCCGTGTCCTAACCCGCAAAATACAGTTTGTAGGGATTCAAAGAAACAATAAGAGATTGTATACCTTAT
1891  TGTGTTGTAAACAGTTTAACTGTAAACACGTGCAATCAATAAATTCGAGAAATATTGTTTGTACATTATTGCAATGACTCATT
1981  GGCAGACAGTTCGTGTTACAGAACTCATCGAAACATTTCTTTAAGTAACTGAGGGCTAATACTGAAATTACTATTGAAGTTATAGAGGG
2071  TCGTATTTTAAAGTAATAGAGATTTTAGGCTCTGAGGGGAAGAGAGATTATTTTGAATTTATAGAGGTTTTTACTACGTCACAAAAC
2161  CACGAACTTTACCTCTTTATAATATTAATATAGATATAACAAATATGTTATAATAGTATAACGTTTAAATTTCTGTTAGACTTCTACTGT
2251  TATATTATTTTTCAGTGTACAATTAACATTCAAGAAAACCCCTAATATGGACAATTGTATCATGTACTCATAATGATATTCATCTTTTA
2341  GATAAGCGTTTAAAAAGAGCAATCAACGACGCAACCTTCTGAAAAAGTACCAACGAATTGAAGTTTAGGTGGATTGCTGAAAAATG
173  I S V L K R R Q S T T Q P S E K V P N E L K F R W I A E K W
2431  GCAGATCAGTGTGGATGTGTATGCACCAGGGACTACCGAGATACTATTAATCAAGATTAA
203  Q I S V G C V C T R D Y R D T I N Q D *

```

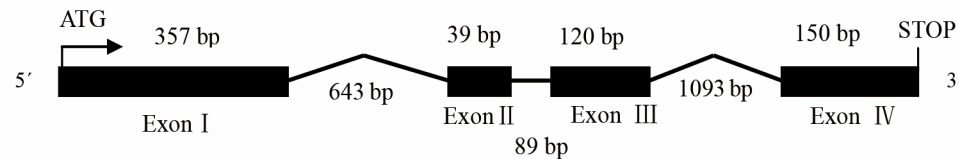

Fig.S2

*ApETH* gene

1 ATGAGTTTCAAATTGGCAACGGTCTTTGCAACATACTGCCTACTCTGCGTCCTAATCCAATCGAAGCTTCGTTTATCAAACCTAACAAAC  
1 M S F K L A T V F A T Y C L L C V L I Q I E A S F I K P N N  
91 GTACCCAGAGTTGGACGGAGCAACGAGGCTTTGACTCCGTTTGATCAGGGGATGATGGGATACGTAATTAAACCAATAAAAAATATACCA  
31 V P R V G R S N E A L T P F D Q G M M G Y V I K T N K N I P  
181 CGCATGGGAAGAAGAAATTATGATTCGGTAAGTTATAAAAAATTTTTTTTTTAATAACCGATATGTATAACTCGTTTGTAAATTACTTGT  
61 R M G R R N Y D S  
71 ACATTGATTGTTTCTTTTCATCCATGGTTAGTCCAGTATAATAAGATTATATTAATACTGACTTTTCTAGTTTGATTAGGTCCAATTAC  
361 ACTTTTACAAAAGGCCGGCAACGCACTTGTGACTCCCGCGGTGCTAGTGTATTGACGGCGGTGATCACTTACCATCGGATGACCC  
451 GTATGTTTCGTTTGCTCTTATAATATAAAAAAATACTTCTGGAGTTTACGAACAATATAATATTTAATTCATATGCCTTAATTATTT  
541 CCTGTATAATATTTAATTTTACAATATAATATCATTATTTTGTCTAAAGCACTTAGTTAAAAATAAGATCTGAAGATCATTAGTTTAA  
631 TACAAAATTTATTTTAACTAGCGGGCCGGCGGAGGTTGTCGCGCTTGATGATATTTTTTAAAAATCTAAAAATCAACCCGATGGCCA  
721 CCTACCGGTCCAATCTAAGCCATTCTCGGATCCACTCGAACACGCACAAAAATTCATCAAAATCGGTCCAACCTGTTAGAAGGAGTT  
811 CAGTGACATACACAAGTACAGAAGAAATGTATATATAAGATGTACAAATATATAAATTAGTTAGCTGGTATCTAATAATTATTACTGGG  
901 ATAGATACTTATTGAAATTTATTTTTATTATATTATTATTTAGGAAAACCGGTACAACATCCCAAACTGTATCAATTTCCCGTC  
70 E N R Y N I P K L Y Q F P V  
991 GAAAATGCTGAATATTATGGAGGTACGTATACTATAAAGGAATATGATTTAACGTTTCTAAAAGTTATAACGTTACTAATATAAATTTTA  
84 E N A E Y Y G  
1081 ATATAATTTTAGATGAAGGACAAAGCAACACTCAAGAACAACCTTGACACGTACTATGTTAAACAAATGGAAAATATGAAGAAATGA  
91 D E G Q S N T Q E Q L D T Y Y V K Q M E N M K K \*

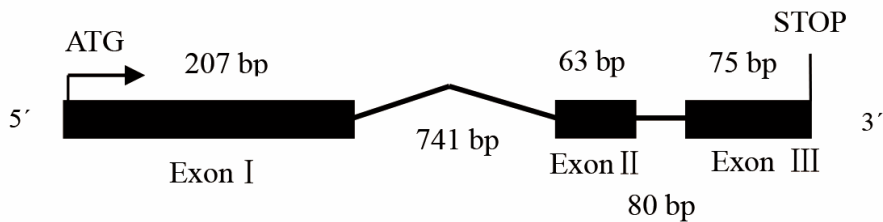

Fig.S3

[illegible]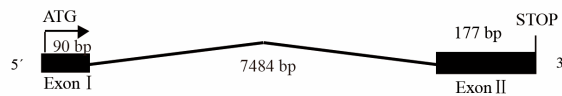

Supplement: s1 [file s1]
